# Supplementary material for: Comparative analysis of Alzheimer’s disease knock-in model brain transcriptomes implies changes to energy metabolism as a causative pathogenic stress
Source: bioRxiv or medRxiv preprint supplement (doi:10.1101/2021.02.16.431539), 2021-02-19
Supplement: Supplementary file [file media-1.pdf]

***psen1* Q96\_K97del experiment**

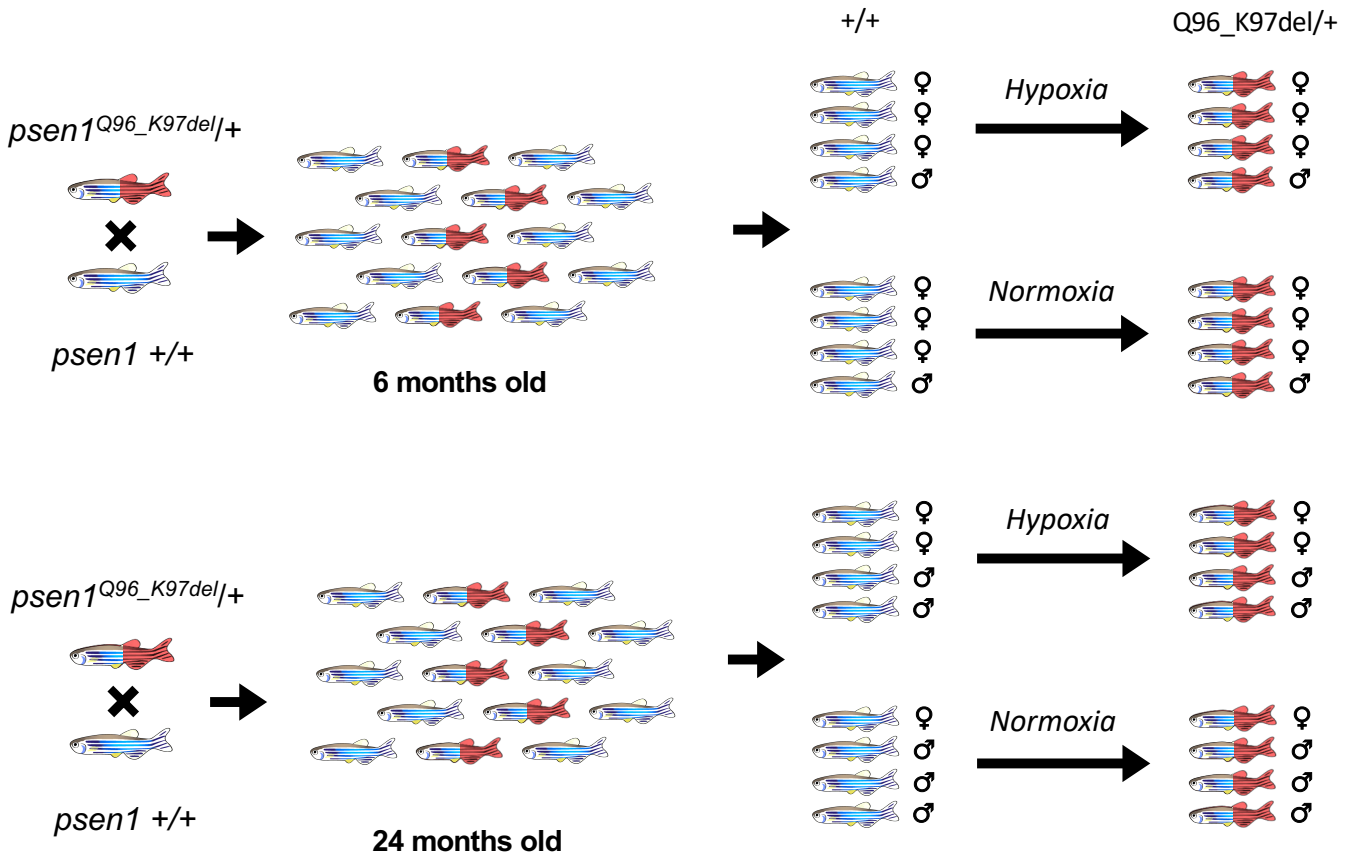

Two families of zebrafish were generated by mating a wild type fish with a fish heterozygous for the Q96\_K97del mutation of *psen1*, resulting in families of fish either heterozygous for the Q96\_K97del mutation, or wild type. These families were raised together in single tanks until 6 or 24 months of age. Then, subsets of the families were genotyped using allele-specific polymerase chain reactions (PCRs), followed by hypoxia treatment. Then fish were sacrificed and n = 4 fish per genotype and treatment were subject to RNA-seq analysis.

***psen1* K97Gfs experiment**

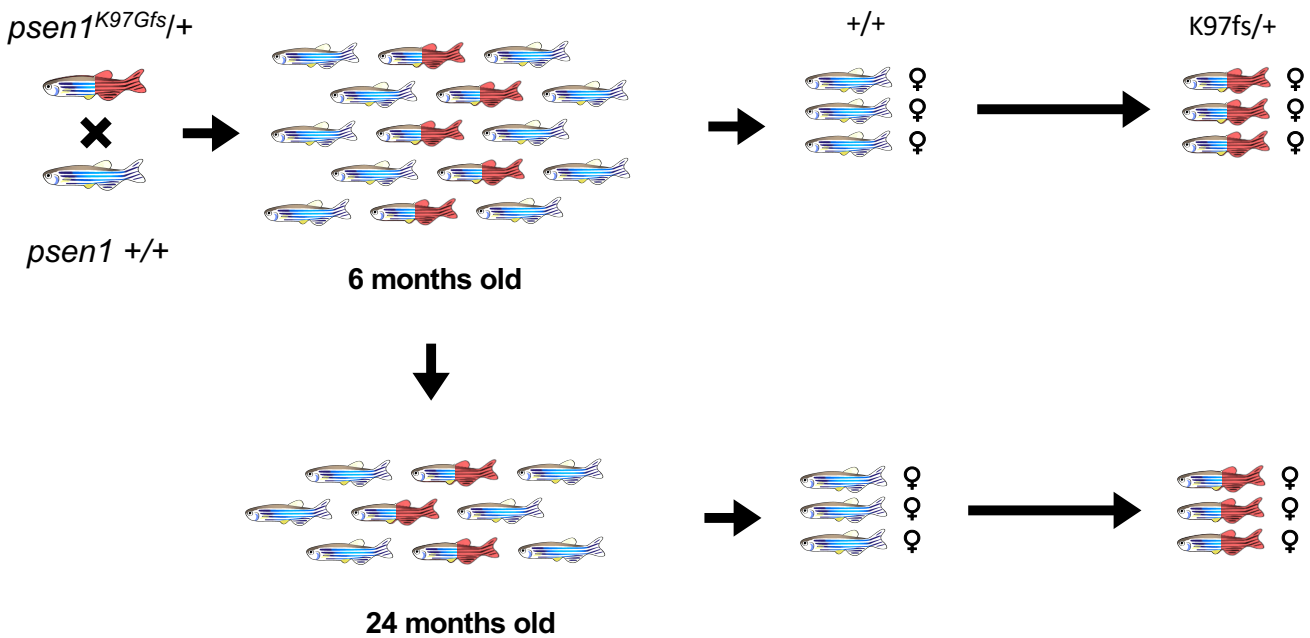

A wild type fish was mated with a fish heterozygous for the K97Gfs mutation of *psen1*, resulting in a family fish either heterozygous for the K97Gfs mutation, or wild type. This family of fish was raised together in a single tank until 6 months of age. Then, a subset of the family were genotyped using allele-specific polymerase chain reactions (PCRs), then fish were sacrificed and brains were removed for RNA-seq. The remaining fish in the tank were allowed to develop until 24 months of age where this was repeated to generate the aged samples for RNA-seq.

## *psen1* T428del vs W233fs experiment

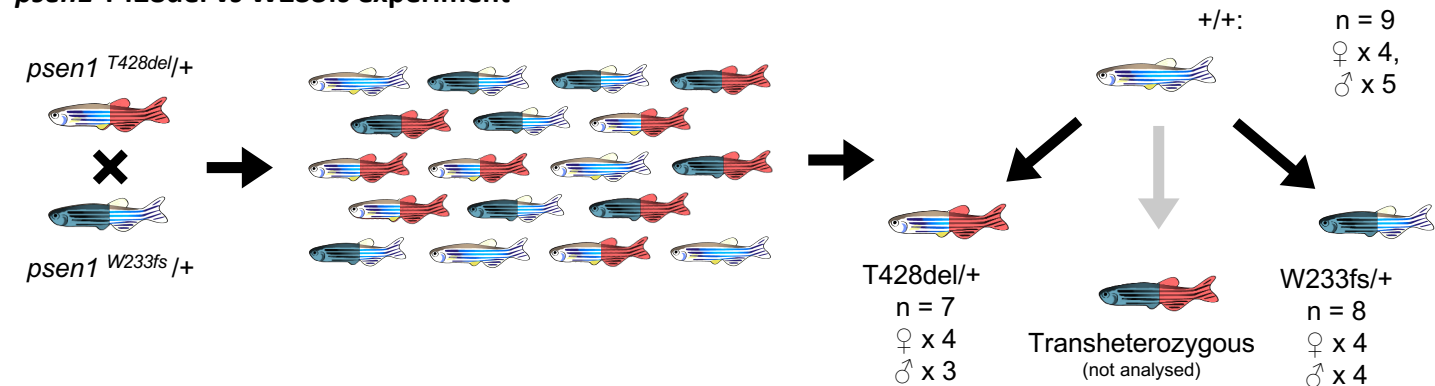

A fish heterozygous for the T428del (EOfAD-like) mutation of *psen1* was mated with a fish heterozygous for the W233fs mutation (similar to the P242fs mutation of human *PSEN1* causative for familial acne inversa) to generate a family of sibling fish with four possible *psen1* genotypes. This family was raised together in the same tank until 6 months of age, at which time 50 fish were randomly selected and sacrificed in a loose ice slurry. Fish were genotyped after sacrifice by allele specific PCRs. Then n = 8 fish per genotype (4 females and 4 males) were subjected to RNA-seq analysis. During the RNA-seq analysis, one T428del/+ fish was identified to be incorrectly genotyped and was re-classified as wild type.

## *psen2* frameshift vs EOfAD-like experiment

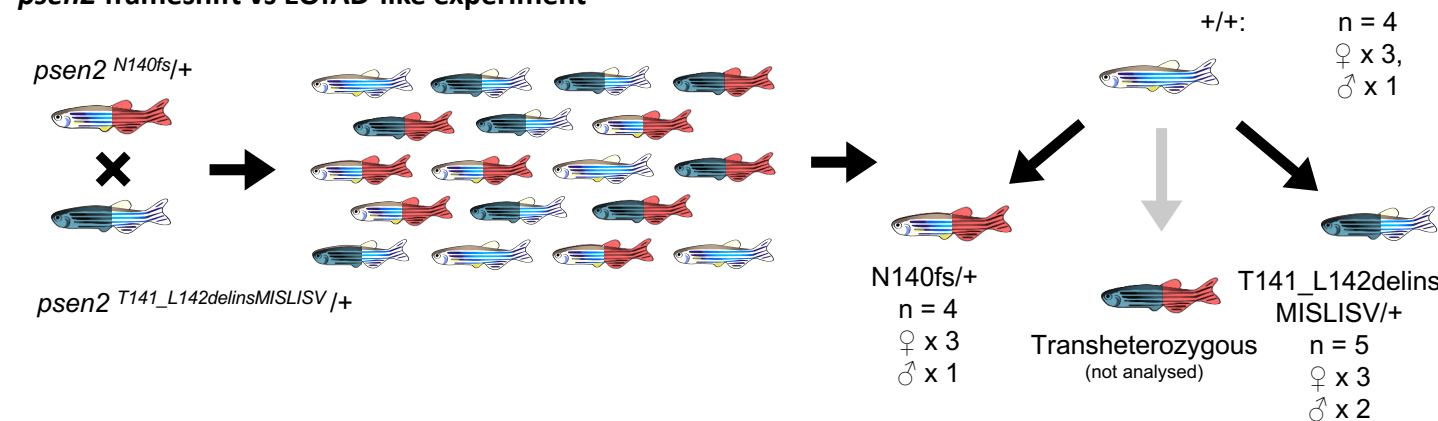

A fish heterozygous for the N140fs (not EOfAD-like) mutation of *psen2* was mated with a fish heterozygous for the T141\_L142delinsMISLISV (EOfAD-like) mutation of *psen2* to generate a family of sibling fish with four possible *psen2* genotypes. This family was raised together in the same tank until 6 months of age, at which time 24 fish were randomly selected and sacrificed in a loose ice slurry (to allow for n = 5 of each genotype in the RNA-seq analysis). Fish were genotyped after sacrifice by allele specific PCRs. Then n = 5 fish per genotype (3 females and 2 males) were subjected to RNA-seq analysis. During the RNA-seq analysis, one wild type fish was an obvious outlier and was omitted from the rest of the analysis, and one N140s/+ sample has been incorrectly genotyped and was also omitted.

## *sor11* W1818\* experiment

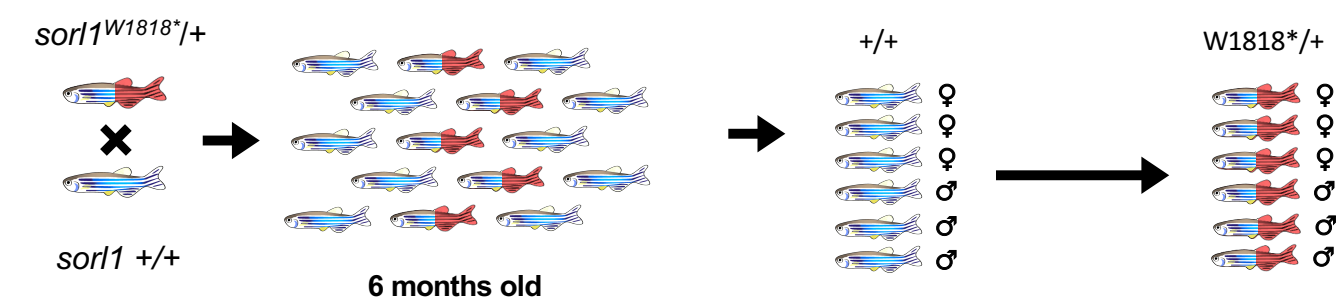

A fish heterozygous for the W1818\* (EOfAD-like) mutation of *sor11* was mated with a wild type fish to generate a family of sibling fish with two possible *sor11* genotypes. This family was raised together in the same tank until 6 months of age, at which time 20 fish were randomly selected and sacrificed in a loose ice slurry (to allow for n = 6 of each genotype in the RNA-seq analysis). Fish were genotyped after sacrifice by allele specific PCRs. Then n = 3 fish per genotype and sex were subjected to RNA-seq analysis.

## *sor1* V1482Afs and R122Pfs experiment

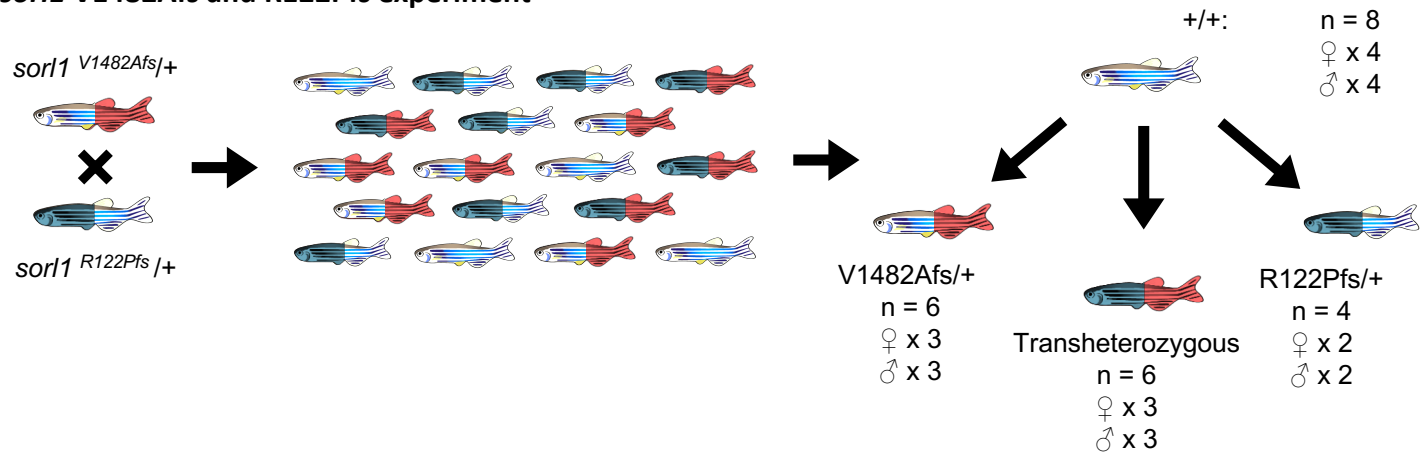

A fish heterozygous for the V1482Afs (EOfAD-like) mutation of *sor1* was mated with a fish heterozygous for the R122Pfs mutation to generate a family of sibling fish with four possible *sor1* genotypes. This family was raised together in the same tank until 6 months of age, at which time 50 fish were randomly selected and sacrificed in a loose ice slurry (to allow for n = 6 of each genotype in the RNA-seq analysis). Fish were genotyped after sacrifice by allele specific PCRs. During the RNA-seq analysis, two R122Pfs/+ fish were identified to be incorrectly genotyped and were re-classified as wild type.
